# Supplementary material for: Remanufacturing Perovskite Solar Cells and Modules – a Holistic Case Study
Source: Research Square preprint supplement (doi:10.21203/rs.3.rs-1767937/v1), 2022-06-21
Supplement: Supplementary file 1 [file 27bdc483a9bcf3138fee8b5e.xlsx]

## Sheet: PSM production
FTO glass production (CVD)
Type	Process	Amount	Unit	Source	Own process	Comment
O	FTO glass	1	m2			10% precursor efficiency, 700 nm thick layer
I	Flat glass, uncoated {RER}| market for flat glass, uncoated | APOS, S	5.5	kg			Flat glass represents float glass, as 95% of flat glass output in Europe was float glass [48]
I	Hydrogen fluoride {RER}| market for hydrogen fluoride | APOS, S	0.00121307	kg			HF used according to [44-47] ~1.5% wt ratio F:SnO2 [44]
I	Tin tentachloride	0.0756756	kg		yes	More precursors possible, but SnCl4 found to be often used [177], [181], [184], [262], [310], Own synthesis
I	Water, deionised {Europe without Switzerland}| water production, deionised | APOS, S	0.0104572	kg			Estimate from stochiometric reaction
I	Nitrogen	0.0529239	kg			Nitrogen used as carrier gas [45], [47], [48] [50-52] Amount based on [53]
P	Electricity, medium voltage {DE}| market for | APOS, S	1.39634	kWh			(85.2225 m2 per hour), 5500 series atmospheric pressure CVD system, manufacturer; Gebr. Schmid. Based on 17 kWh/h for 3300 wafers (180 nm) throughput of 0.0258 cm2. Adjusted for thickness
Emissions to air
E	Hydrogen chloride	0.000221101	kg
E	Nitrogen, atmospheric	0.0529239	kg
E	Hydrogen fluoride	0.00109177	kg			Unreacted HF, this is likely lower in reality, because emission gases are typically neutralized in industry, and not emitted [46] & [54]
Emissions to water
E	Water	0.000145231	kg
Waste
W	Municipal solid waste {DE}| treatment of, incineration | APOS, S	0.068108	kg			Tin oxide and Chlorine. Non-reacting tin is oxidized into tin oxide and the halides are removed using a packed bed chemical scrubber [46]
W	Waste heat	5.02684	MJ
Transport
P	Transport, freight train {RER}| market group for transport, freight train | APOS, S	0.0454053	tkm			SnCl4, standard distance
P	Transport, freight, lorry 16-32 metric ton, euro6 {RER}| market for transport, freight, lorry 16-32 metric ton, EURO6 | APOS, S	0.00756756	tkm			SnCl4, standard distance
FTO glass cutting				See SI word file
Type	Process	Amount	Unit	Source	Own process	Comment
O	FTO glass (cut)	5.5	kg
O	Glass cullet, sorted {GLO}| market for | APOS, S	0.289474	kg			5% losses (Can range between 0 and 10% [55 & 56])
I	FTO glass	5.78947	kg
P	Electricity, medium voltage {PL}| market for | APOS, S	0.167231	kWh	[57]		0.759 kWh electricity and 0.49 kWh compressed air per 43.24 kg glass)
Waste
W	Waste heat	0.60203	MJ
FTO Glass Washing
Type	Process	Amount	Unit	Source	Own process	Comment
O	FTO glass, washed	1	m2
I	Electricity, medium voltage {DE}| market for | APOS, S	0.169256	kWh	[57]		0,85 kWh electricity & 0,2 kWh compressed air per 34.12 kg glass
I	Water, ultrapure {RER}| water production, ultrapure | APOS, S	3.50877		[58]		30.85 kg per 34.12 kg glass
Emissions to air
E	Heat, waste	0.60932
Emissions to water
E	Waste water	3.50877
Transport
P	Transport, freight train {RER}| market group for transport, freight train | APOS, S	3.3	tkm			Standard distance
P	Transport, freight, lorry 16-32 metric ton, euro6 {RER}| market for transport, freight, lorry 16-32 metric ton, EURO6 | APOS, S	0.55	Tkm			Standard distance
c-TiO2 (Spray pyrolysis)
Type	Process	Amount	Unit	Source	Own process	Comment
O	c-TiO2 layer	1	m2			0,0001134 kg based on 39.5% MUE, 30 nm thick layer, density (rutile) TiO2 = 3.78 g/cm3
I	TAA (in isopropanol, 25 wt%)	0.00163672	kg		yes
I	Ethanol, market for	0.0161042				53 ml per 3.4 g TAA in [271]
P	Electricity	0.588235	kWh			Electricity use from [271], similar to [29]
Emissions to air						Typically, solvents will be caught away and burned to ash, but here modelled as air emission as conservative estimate
E	Isopropanol	0.000409181	kg
E	Ethanol	0.0161042	kg
E	TAA	0.00119598	kg			Modelled as titanium, isopropanol and isopropenyl acetate emissions (1:2:2 molar ratio)
E	Heat, waste	2.11765	MJ
Transport
P	Transport, freight train {RER}| market group for transport, freight train | APOS, S	0.000982035	tkm			Standard distances
P	Transport, freight, lorry 16-32 metric ton, euro6 {RER}| market for transport, freight, lorry 16-32 metric ton, EURO6 | APOS, S	0.000163672	tkm			Standard distances
Laser Scribing
Type	Process	Amount	Unit	Source	Own process	Comment	Own process	Comment
		P1	P2	P3
O	P1 scribe	1	x	x	m2
O	P2 scribe	x	1	x	m2
O	P3 scribe	x	x	1	m2
I		0.0289352	0.0289352	0.0289352	kWh		[171]
Emissions to air	P. Sihna and L. De Rosa, “Alternatives assessment. Alternaties to SnPb solder for First Solar’s transition from Series 4 to Series 6 manufacturing.” 2019. Accessed: Jul. 26, 201AD. [Online]. Available: https://www.firstsolar.com/en-Emea/-/media/First-Solar/Sustainability-Documents/Alternatives-Assessment-to-SnPb-Solder.ashx
E	Electricity, medium voltage {DE}| market for | APOS, S	0.104167	0.104167	0.104167	MJ
E	Tin oxide	2.50E-05	x	x	kg			From FTO
E	Fluorine	3.80E-08	x	x	kg			From FTO
E	Titanium oxide	1.03E-06	1.58E-05	7.88E-06				From TiO2
E	Lead iodide	x	2.09E-05	1.04E-05				Perovskite layer, Modelled as lead and iodide
E	Methylammonium iodide	x	7.19E-06	3.60E-06				Perovskite layer, odelled as Methylamine and iodide
E	Carbon	x	x	3.97E-04				Carbon layer
	m-TiO2 Screen Printing
Type	Process	Amount	Unit	Source	Own process	Comment
O	m-TiO2 layer	1	m2			layer thickness 350nm, porosity of 52.3%
I	TiO2 NP paste	0.00371683	kg		yes	95% MUE
I	Terpineol	0.00278763	kg		yes	75 wt% of TiO2 paste
I	Fibre, polyester {GLO}| market for fibre, polyester | APOS, S	0.000213747	kg			Screens for screen printing
P	Electricity, medium voltage {DE}| market for | APOS, S	0.44701	kWh			Curing at 450 C
P	Electricity, medium voltage {DE}| market for | APOS, S	0.0134452	kWh			Screen printing. Based on smaller wafers (throughput 7200 wafers/h, area 0.0258 cm2), AIRON metallization line, ASYS [53]
P	Electricity, medium voltage {DE}| market for | APOS, S	0.0234412	kWh			Compressed air for screen printing.
P	Electricity, medium voltage {DE}| market for | APOS, S	0.200543	kWh			Compressed air for annealing
P	Tap water {Europe without Switzerland}| market for | APOS, S	18.1851	kg			For cooling
Emissions to air						Solvents used could be refluxed, but such small quantities that they are here considered to be evaporated (as conservative estimate)
E	heat	1.65764	MJ
E	Terpineol	0.00185842	kg			Modelled as a-pinene
E	Ethyl cellulose	0.000371683
E	2-(2-butoxyethoxy) ethyl acetate	0.000743367
Waste
W	Municipal solid waste {DE}| market for municipal solid waste | APOS, S	0.000213747	kg			Screens
Transport						443km from sigma aldrich (a terpineol), Standard transport assumed for paste [59]
P	Transport, freight train {RER}| market group for transport, freight train | APOS, S	0.00403092	tkm			based on 600/700 km coming from train average from [59]
P	Transport, freight, lorry 16-32 metric ton, euro6 {RER}| market for transport, freight, lorry 16-32 metric ton, EURO6 | APOS, S	0.000671821	tkm			based on 100/700 km coming from lorry average from [59] screens based on 140 km to isenmann siebe gmbh, 100km for solvent waste transport
MAPbI3 Perovskite precursor solution
Type	Process	Amount	Unit	Source	Own process	Comment
O	MAPBI3 precursor solution (industrial)	1	kg			1 kg MAPbI3 in DMSO:DMF solution
I	MAI	0.256411	kg		yes
I	PbI2	0.743589	kg		yes	1 M solution
I	Butyrolactone {RER}| market for butyrolactone | APOS, S	1.71348	kg
I	Nitrogen, liquid {RER}| market for | APOS, S	0.00582228	kg			Density N2 gas: 1,2506 kg/m3
P	Electricity, low voltage {DE}| market for | APOS, S	0.00288476	kWh			Stirring, 60 oC. 2 Hot plate stirrers assumed to be continuously turned on [60].
P	Electricity, low voltage {DE}| market for | APOS, S	0.00596871	kWh			Glovebox, electricity from [61]
Emissions
E	Heat, waste	0.0318725	MJ
Transport
P	Transport, freight train {RER}| market group for transport, freight train | APOS, S	0.6	tkm			Standard distances assumed
P	Transport, freight, lorry 16-32 metric ton, euro6 {RER}| market for transport, freight, lorry 16-32 metric ton, EURO6 | APOS, S	0.1	tkm			Standard distances assumed
Perovskite layer (slot-die coated)
Process	Input	Value	Unit	Source	Own process	Comment
O	Perovskite layer (blade-coated)	1	m2
I	MAPbI3 precursor solution	0.0212598	kg		Yes	95% MUE
P	Electricity, medium voltage {DE}| market for | APOS, S	0.0322685	kWh			Inkjet printing
P	Electricity, medium voltage {DE}| market for | APOS, S	0.226811	kWh			Annealing 10 mins 120 C
P	Electricity, medium voltage {DE}| market for | APOS, S	0.0363156	kWh			Electricity for compressed dry air
Emissions to air						Solvents are assumed to be evaporated, but in reality there likely needs to be a system in place to capture the (toxic) solvents
E	N,N-Diethylformamide	0.0364282	kg
E	Heat, waste	1.06342	MJ
Carbon electrode (slot-die coated)
Type	Process	Amount	Unit	Source	Own process	Comment
O	Carbon electrode layer	1	m2			20 um thick
I	Carbon black {GLO}| market for | APOS, S	0.00547175	kg			90% material utilisation efficiency used, based on the assumption that the amount of paste deposited is exactly enough to deposit 15 um of carbon
I	Graphite {GLO}| market for | APOS, S	0.021887	kg			CB: Graphite ratio of around 20% is optimal for trade-off between conductivity and porosity, according to [62]
I	Terpineol	0.0615572	kg		Yes	25 wt% carbon in carbon paste, rest assumed to be 1:3 nitrocellulose:terpineol based on [62]
I	Nitrocellulose	0.0205191	kg		Yes
I	Fibre, polyester {GLO}| market for fibre, polyester | APOS, S	0.000213747	kg			Screens for screen printing, Siebe GmBH (made from polyester)
I	Tap water	14.5481	kg			cooling water
I	Electricity, medium voltage {DE}| market for | APOS, S	0.0134452	kWh			Screen printing
P	Electricity, medium voltage {DE}| market for | APOS, S	0.0234412	kWh			Compressed dry air for screen printing
I	Electricity, medium voltage {DE}| market for | APOS, S	0.414304	kWh			Annealing, 30 mins 400 C
I	Electricity, medium voltage {DE}| market for | APOS, S	0.183999	kWh			Compressed dry air for annealing
Emissions
E	Heat, waste	2.28668	MJ
E	Terpineol	0.0615572	kg
E	Nitrocellulose	0.0205191	kg
Waste
W	Municipal solid waste {DE}| market for municipal solid waste | APOS, S	0.000213747	kg			Screens
Transport
P	Transport, freight train {RER}| market group for transport, freight train | APOS, S	0.0657892	tkm
P	Transport, freight, lorry 16-32 metric ton, euro6 {RER}| market for transport, freight, lorry 16-32 metric ton, EURO6 | APOS, S	0.0109649	tkm
ZrO2 deposition
Type	Process	Amount	Unit	Source	Own process	Comment
O	m-ZrO2 layer	1	m2			1600 nm thick
I	Zirconium oxide {GLO}| market for | APOS, S	0.0045727	kg			5% material loss, density zro2 5.68 g/cm3
I	Ethyl cellulose	0.00152423	kg			ZrO2 paste mass ratio: ZrO2:ethyl cellulose:terpineol 0.3:0.1:0.6 [4]
I	Terpineol	0.0091454	kg
I	Fibre, polyester {GLO}| market for fibre, polyester | APOS, S	0.000213747	kg			Screens for screen printing, Siebe GmBH (made from polyester)
P	Electricity, medium voltage {DE}| market for | APOS, S	0.44701	kWh			Curing at 450 C for 30 mins, can be done at 400C, together with carbon paste at once [12]
P	Electricity, medium voltage {DE}| market for | APOS, S	0.0134452	kWh			Screen printing. Based on smaller wafers [53] (throughput 7200 wafers/h, area 0.0258 cm2)
P	Electricity, medium voltage {DE}| market for | APOS, S	0.0234412	kWh			Compressed dry air for screen printing
P	Electricity, medium voltage {DE}| market for | APOS, S	0.200543	kWh			Compressed air
P	Tap water {Europe without Switzerland}| market for | APOS, S	18.1851	kg			For cooling
Emissions to air
E	Heat	1.65764	MJ
E	Ethyl cellulose	0.00152423	kg
E	Terpineol	0.0091454	kg
Waste
W	Municipal solid waste {DE}| market for municipal solid waste | APOS, S	0.0091454	kg			Screens
P	Transport, freight train {RER}| market group for transport, freight train | APOS, S	0.00653003	tkm			based on 600/700 km coming from train average from [59]
P	Transport, freight, lorry 16-32 metric ton, euro6 {RER}| market for transport, freight, lorry 16-32 metric ton, EURO6 | APOS, S	0.00108834	tkm			based on 100/700 km coming from lorry average from [59] screens based on 140 km to isenmann siebe gmbh, 100km for solvent waste transport
Encapsulation
Type	Process	Amount	Unit	Source	Own process	Comment			Thickness
O	Encapsulated PSM	1	m2					Cell stack	0.02053	mm	excluding FTO
I	TPO	0.734085	kg		Yes	HDPE density 941 kg/m3, 5 mm cutting loss on each side [4]		Encapsulant	0.8	mm
I	Polyisobutylene with desiccant	0.04479	kg		Yes	PIB density 920 kg/m3		Total	0.82053	mm
P	Electricity	0.986214	kWh			Encapsulation machine, includes vacuum, heating and cooling
Emissions to air
E	Heat, waste	3.55037	MJ
Waste
W	Waste plastic mixture, market for	0.0185063	kg			TPO waste
Transport
P	Transport, freight train {RER}| market group for transport, freight train | APOS, S	0.146817	tkm			Standard transport distance (200 km) [59]
P	Transport, freight, lorry 16-32 metric ton, euro6 {RER}| market for transport, freight, lorry 16-32 metric ton, EURO6 | APOS, S	0.0734085	tkm			Standard transport distance (100 km) [59]
Backsheet glass
Type	Process	Amount	Unit	Source	Own process	Comment
O	Backsheet glass	1	m2
O	Glass cullet, sorted {GLO}| market for | APOS, S	0.394737	kg
I	Solar glass, low-iron {GLO}| market for | APOS, S	7.89474	kg			3 mm thick, thickness roughly (small variations) used in many technologies (CdTe First Solar 4, CIGS, c-Si/PSC tandem) [64],[65] 5% losses
I	Water, ultrapure {RER}| market for water, ultrapure | APOS, S	3.50877	kg
P	Electricity	0.336486	kWh			Cutting and Washing
P	Tempering, flat glass {RER}| processing | APOS, S	7.89474	kg			Tempering of solar glass to provide extra strength
Emissions to air
E	Heat, waste	1.21135	MJ
Emissions to water
E	Waste water	3.50877	kg
Bus bar and junction box attachment
Type	Process	Amount	Unit	Source	Own process	Comment
O	Bus bar and junction box (attached)	1	m2
I	Solder, bar, Sn95.5Ag3.9Cu0.6, for electronics industry {GLO}| market for | APOS, S	0.000374562	kg			Based on material used for PSMs [67]. Often still tin-lead solder used in thin film (e.g. CdTe) [68], but Pb-free solder assumed here to omit Pb problems. Amount from [69]
I	Indium {GLO}| market for | APOS, S	0.000705	kg			Indium solder. Amount from [69]
I	Copper {GLO}| market for | APOS, S	0.00887574	kg			For bus bar, based on first solar current production of CdTe (Series 6 [70] same as [69])
I	Glass fibre reinforced plastic, polyamide, injection moulded {GLO}| market for | APOS, S	0.108051	kg			For junction box cables, amount from CdTe used [65]
I	Silicone product {RER}| market for silicone product | APOS, S	0.00296505	kg			To attach junction box [69]
P	Electricity	0.787	kWh			Soldering, welding and attaching junction box to back glass [58]
Testing
Type	Process	Amount	Unit	Source	Own process	Comment
O	Tested PSM	1	m2
P	Electricity, medium voltage {DE}| market for | APOS, S	0.02	kWh			2 kW machine [72] (88.2 throughput assumed).
Emissions to air
E	Heat, waste	0.08	MJ

## Sheet: Chemicals
TiO2 related chemicals
Ammonium fluoride production				[1]
Type	Process	Amount	Unit	Source	Own process	Comment
O	Ammonium fluoride	1	kg
I	Ammonia, liquid {RER}| market for | APOS, S	0.46	kg
I	Heat, heavy fuel oil, at industrial furnace 1MW/RER S	0.57	MJ
I	Hydrogen fluoride {RER}| market for hydrogen fluoride | APOS, S	0.54	kg
P	Chemical factory, organics {GLO}| market for | APOS, S	4e-10	unit
Waste
W	Waste heat	0.57	MJ
Tin tetrachloride production				[2]
Type	Process	Amount	Unit	Source	Own process	Comment
O	Tin tetrachloride	1	kg			95% yield
I	Tin {GLO}| market for | APOS, S	0.48	kg			No RER market for available
I	Chlorine, liquid {RER}| market for chlorine, liquid | APOS, S	0.57	kg			1:2 molar Sn:Cl2
I	Heat, natural gas, at industrial furnace >100kW/RER S	0.13	MJ			Only low temperatures required (110-115 C) [3]
P	Chemical factory, organics {GLO}| market for | APOS, S	4e-10	unit
Emissions to water
E	Tin	0.02	kg
E	Chlorine	0.03	kg
Emissions to air
E	Tin	4.8e-05	kg
E	Chlorine	5.73e-05	kg
a-Terpineol production				[4]
Type	Process	Amount	Unit	Source	Own process	Comment
O	a-Terpineol	1	kg
I	Water, deionised {Europe without Switzerland}| water production, deionised| APOS, S	0.12	kg
I	Dichloromethane {RER}| market for dichloromethane | APOS, S	0.55	kg
I	Hydrogen, liquid {RER}| market for | APOS, S	0.03	kg
I	Acetone, liquid {RER}| market for acetone, liquid | APOS, S	0.75	kg
I	Acetylene {RER}| market for acetylene | APOS, S	0.34	kg
P	Electricity, medium voltage {DE}| market for | APOS, S	0.42	kWh			Produced at Sigma-Aldrich (DE)
P	Chemical factory, organics {GLO}| market for | APOS, S	4e-10	unit
Emissions to water
E	Hydrogen chloride	0.24	kg
E	Water	0.12	kg
E	Organic chlorine compounds (unspecified)	0.43	kg
Waste
W	Waste heat	1.51	MJ
TTIP (Titanium (IV) isopropoxide)				[5]-[7]
Type	Process	Amount	Unit	Source	Own process	Comment
O	TTIP	1	kg
O	Ammonium chloride {GLO}| market for | APOS, S	0.941014	kg
I	Titanium tetrachloride {GLO}| market for | APOS, S	0.834301	kg
I	Isopropanol {RER}| market for isopropanol | APOS, S	1.05728	kg
I	Ammonia, liquid {RER}| market for | APOS, S	0.618118	kg			Assumed in liquid form
I	Benzene {GLO}| market for | APOS, S	1.6	kg
P	Electricity, medium voltage {DE}| market for | APOS, S	0.00833333	kWh			Mixing and filtration
P	Chemical factory, organics {GLO}| market for | APOS, S	4e-10	unit
Emissions to air
E	Ammonia	0.000247247	kg			0.2% fugitive emissions
E	Heat, waste	0.03	MJ
Waste
W	Isopropanol waste incineration	0.211456	kg		yes	Does not evaporate
W	Benzene incineration	1.6	kg		yes	Benzene and unreacted precursors, do not evaporate.
W	Hazardous waste, for incineration {Europe without Switzerland}| market for hazardous waste, for incineration | APOS, S	0.16686	kg			Mostly titanium tetrachloride
Ketene production				[8],[9]
Type	Process	Amount	Unit	Source	Own process	Comment
O	Ketene	1	kg			42.04 g/mol
O	Methane, 96% by volume {RoW}| market for methane, 96% by volume | APOS, S	0.580733	m3			16.04 g/mol, 0.657 kg/m3
I	Acetone, liquid {RER}| market for acetone, liquid | APOS, S	1.53505	kg			specific heat 75 J/mol K, 58.08 g/mol
P	Electricity, medium voltage {DE}| market for | APOS, S	2.34521e-05	kWh			Pumping
P	Natural gas, burned in industrial furnace >100kW/RER S	2.99232	MJ			Heat up to 700 C
P	Chemical factory, organics {GLO}| market for | APOS, S	4e-10	unit
Emissions to air
E	Heat, waste	8.44275e-05	MJ
E	Acetone	0.000307009	kg			0.2% fugitive emissions
Waste
W	Hazardous waste, for incineration {Europe without Switzerland}| market for hazardous waste, for incineration | APOS, S	0.153505	kg
Isopropenyl acetate				[10]
Type	Process	Amount	Unit	Source	Own process	Comment
O	Isopropenyl acetate	1	kg			Yield 90% based on acetone, 93% based on ketene [10]
O	Acetic anhydride {RER}| production, ketene route | APOS, S	0.113297	kg			Unreacted ketene reacts with acetic acid to forma cetic anhydride
I	Ketene	0.466551	kg
I	Acetone, liquid {RER}| market for acetone, liquid | APOS, S	0.623768	kg
I	Acetic acid, without water, in 98% solution state {GLO}| market for | APOS, S	0.0666445	kg			To scrub unreacted ketene
P	Natural gas, burned in industrial furnace >100kW/RER S	0.122856	MJ			Heated to 68 C (ambient 20 C) Specific heat capacity of ketene ~1.24 kJ/kg/K, acetone 2.15 kJ/kg/K
P	Steam, in chemical industry {RER}| market for steam, in chemical industry | APOS, S	1.66819	kg			Distillation, energy from average of empirical values presented in [11]
P	Electricity, medium voltage {DE}| market for | APOS, S	1.0548e-05	kWh			Pumping
P	Chemical factory, organics {GLO}| market for | APOS, S	4e-10	unit
Emissions to air
E	Heat, waste	3.79727e-05	MJ
E	Acetone	8.73275e-05	kg
E	Ketene	9.33102e-05	kg			Ketene emissions also modelled as acetone emissions to air, as no ketene emission process available in ecoinvent.
Waste
W	Acetone waste incineration	0.0436637	kg		yes
Acetylacetonate (from rearranging isopropenyl acetate)				[12]
Type	Process	Amount	Unit	Source	Own process	Comment
O	Acetylacetonate	1	kg			Yield 82% [12]
I	Isopropenyl acetate	1.21939	kg
P	Natural gas	2.76022	MJ
P	Electricity, medium voltage {DE}| market for | APOS, S	0.572742	kWh
P	Steam, in chemical industry {RER}| market for steam, in chemical industry | APOS, S	0.0865137	kg
P	Chemical factory, organics {GLO}| market for | APOS, S	4e-10	unit
Emissions to air
O	CO2	0.0147368	kg			12.6g gaseous byproducts per 285 acetylacetone yield. Mostly consist of co2, methane, ketene but no exact numbers mentioned, so assumed equal.
O	Acetone	0.0294737	kg			acetone used as proxy for methane + ketene, because no process for ketene available
Waste
W	Heat	2.06187	MJ
W	Hazardous waste, for incineration {Europe without Switzerland}| market for hazardous waste, for incineration | APOS, S	0.17518	kg			remainder of unreacted products
Titanium Diisopropoxide bis Acetylacetonate (TAA)				[13-15]
Type	Process	Amount	Unit	Source	Own process	Comment
O	Titanium diiospropoxide bis Acetylacetonate solution (25 wt% isopropanol)	1	kg			mixed with isopropanol
I	TTIP	0.586672	kg			1:2 molar TTIP: acetylacetone
I	Acetylacetone	0.413367	kg
I	Isopropanol	0	kg
I	Electricity, medium voltage {DE}| market for | APOS, S	1.74603e-05	kWh			Stirring, 1h
P	Electricity, medium voltage {DE}| market for | APOS, S	1.52784e-05	kWh			Pumping
P	Chemical factory, organics {GLO}| market for | APOS, S	4e-10	unit
Waste
W	heat	6.28569e-05	MJ
Transport	-	-	-
Titanium dioxide NPs production (sol-gel) 95% Anatase				[5]
Type	Process	Amount	Unit	Source	Own process	Comment
O	Titanium dioixide (95% anatase)	1	kg
I	TTIP	3.559	kg		Yes
I	Methanol {RER}| market for | APOS, S	0.752	kg
I	Water, deionised {RER}| water production, deionised | APOS, S	12.648	kg
P	Electricity, low voltage {DE}| market for | APOS, S	0.17	kWh			Sonication
P	Electricity, low voltage {DE}| market for | APOS, S	4.11111	kWh	[7]		Calcination
P	Electricity, low voltage {DE}| market for | APOS, S	0.811667	kWh			Drying, 80 C, 10 h
P	Chemical factory, organics {GLO}| market for | APOS, S	4e-10	unit
Emissions to air
E	Heat, waste	18.334	MJ
E	Methanol	0.001504	kg			All solvents evaporate during calcination and drying [75a] 0.2% fugitive emissions
E	Isopropanol	0.00602057	kg			All solvents evaporate during calcination and drying [75a] 0.2% fugitive emissions
Waste
W	heat	18.334	MJ
W	Methanol	0.750496	kg			All incinerated except for fugitive emissions
W	Isopropanol	3.01029	kg			All incinerated except for fugitive emissions
Transport
P	Transport, freight train {RoW}| market for | APOS, S	2.1354	tkm			For TTIP, standard amount of transport assumed
P	Transport, freight, lorry 16-32 metric ton, euro6 {RoW}| market for transport, freight, lorry 16-32 metric ton, EURO6 | APOS, S	0.3559	tkm			For TTIP and Waste incineration, standard amount of transport assumed
Chlorethane				[19]
Type	Process	Amount	Unit	Source	Own process	Comment
O	Chlorethane	1	kg
I	Ethylene, average {RoW}| market for ethylene, average | APOS, S	0.434878	kg		molar mass 28.054 g/mol
I	Hydrochloric acid, without water, in 30% solution state {RoW}| hydrochloric acid production, from the reaction of hydrogen with chlorine | APOS, S	0.565153	kg		molar mass 36.458 g/mol
P	Electricity, medium voltage {AU}| market for | APOS, S	1.52783e-05	kWh	Pumping
P	Chemical factory, organics {GLO}| market for | APOS, S	4e-10	unit
Emissions to air
E	Waste, heat	5.50017e-05
Ethyl cellulose				[20]
Type	Process	Amount	Unit	Source	Own process	Comment
O	Ethyl cellulose	1	kg
I	Cellulose fibre, inclusive blowing in {GLO}| market for | APOS, S	0.71347	kg
I	Ethanol, without water, in 99.7% solution state, from ethylene {RoW}| market for ethanol, without water, in 99.7% solution state, from ethylene | APOS, S	0.202718	kg
I	Hydrochloric acid, without water, in 30% solution state {RoW}| hydrochloric acid production, from the reaction of hydrogen with chlorine | APOS, S	0.160404	kg
I	Chloroethane	0.283864	kg		Yes
P	Natural gas	2.76022	MJ
P	Electricity, medium voltage {AU}| market for | APOS, S	0.572742	kWh
P	Steam, in chemical industry {RER}| market for steam, in chemical industry | APOS, S	0.0865137	kg			2.75 MJ/kg
P	Chemical factory, organics {GLO}| market for | APOS, S	4e-10	unit
Emissions to air
E	Heat	2.06187	MJ			to air
Emissions to water
O	Hydrogen chloride	0.1604	kg
2-(2-Butoxyethoxy)ethanol production				[21]
Type	Process	Amount	Unit	Source	Own process	Comment
O	2-(2-butoxyethoxy) ethyl acetate	1	kg
I	Acetic acid, without water, in 98% solution state {RoW}| acetaldehyde oxidation | APOS, S	0.293998	kg
I	2-(2-butoxyethoxy)ethanol	0.794233	kg		Yes
P	Electricity, medium voltage {AU}| market for | APOS, S	7.84909e-05	kWh			Stirring, 4 hours
P	Electricity, medium voltage {AU}| market for | APOS, S	1.66257e-05	kWh			Pumping
P	Chemical factory, organics {GLO}| market for | APOS, S	4e-10	unit
Emissions to air
W	Heat, waste	0.00034242	MJ
E	Oxygen	0.078329	kg
E	Hydrogen	0.009791	kg
Waste
W	Butanol waste incineration	4.11	kg		Yes
2-(2-butoxyethoxy) ethyl acetate				[22]
Type	Process	Amount	Unit	Source	Own process	Comment
O	2-(2-butoxyethoxy) ethyl acetate	1	kg
I	Acetic acid, without water, in 98% solution state {RoW}| acetaldehyde oxidation | APOS, S	0.293998	kg
I	2-(2-butoxyethoxy)ethanol	0.794233	kg		Yes
P	Electricity, medium voltage {AU}| market for | APOS, S	7.84909e-05	kWh			Stirring, 4 hours
P	Electricity, medium voltage {AU}| market for | APOS, S	1.66257e-05	kWh			Pumping
P	Chemical factory, organics {GLO}| market for | APOS, S	4e-10	unit
Emissions to air
W	Heat, waste	0.00034242	MJ
E	Oxygen	0.078329	kg
E	Hydrogen	0.009791	kg
m-TiO2 paste				[4],[23]
Type	Process	Amount	Unit	Source	Own process	Comment
O	m-TiO2 paste	1	kg
I	Titanium dioixide (95% anatase)	0.2	kg		Yes
I	Ethyl cellulose	0.1	kg		Yes
I	2-(2-butoxyethoxy) ethyl acetate	0.2	kg		Yes
I	(a)-Terpineol	0.5	kg		Yes
Energy
Transport
A	Transport, freight train {RoW}| market for | APOS, S	0.48	tkm			Standard
A	Transport, freight, lorry 16-32 metric ton, euro6 {RoW}| market for transport, freight, lorry 16-32 metric ton, EURO6 | APOS, S	0.08	tkm			Standard
Perovskite related chemicals
Potassium iodide				[24],[25]
Type	Process	Amount	Unit	Source	Own process	Comment
O	Potassium iodide	1	kg
O	Potassium iodate	0.229183	kg			1:5 KIO3:KI, 80% yield for KIO3
I	Potassium hydroxide	0.405576	kg
I	Iodine	1.0193	kg
I	Water	1.01086	kg
P	Natural gas, burned in industrial furnace >100kW/RER S	3.04028	MJ			Drying (Water evaporated) twice
P	Natural gas, burned in industrial furnace >100kW/RER S	0.273662	MJ			Fusing of KI at 600 oC
P	Electricity	0.0122918	kWh			Filtration
P	Electricity	3.72126e-05	kWh			Pumping
P	Chemical factory, organics {GLO}| market for | APOS, S	4e-10	unit
Emissions to air
E	Heat, waste	0.0443846	kWh
Emissions to water
E	Waste water	1.01086	kg
Waste
W	Hazardous waste, for incineration {Europe without Switzerland}| market for hazardous waste, for incineration | APOS, S	0.130584	kg			Remainder of reactants
Lead nitrate				[26]
Type	Process	Amount	Unit	Source	Own process	Comment
O	Lead nitrate	1	kg
I	Lead {GLO}| market for | APOS, S	0.695115	kg
I	Nitric acid, without water, in 50% solution state {RER}| market for nitric acid, without water, in 50% solution state | APOS, S	1.12739	kg
I	Water, deionised {Europe without Switzerland}| water production, deionised | APOS, S	0.2	kg
P	Electricity, medium voltage {DE}| market for | APOS, S	3.08994e-05	kWh			Pumping
P	Heat, natural gas, at industrial furnace >100kW/RER S	0.243158	MJ			Heated to 80C, 2 hours
P	Chemical factory, organics {GLO}| market for | APOS, S	4e-10	unit
Emissions to air
E	Nitrogen monoxide	0.0604066	kg			2:8 mol to nitric acid
E	Heat, waste	0.000111238	MJ
Waste
W	Hazardous waste to incineration	0.962102	kg			Remainder of unreacted lead, nitric acid and water
Hydroiodic acid (57% in water)				[27]
Type	Process	Amount	Unit	Source	Own process	Comment
O	Hydriodic acid production	1	kg
O	Sulfur	0.142889	kg			coproduct
I	Hydrogen sulfide {RER}| market for hydrogen sulfide | APOS, S	0.168841	kg
I	Iodine	0.62835	kg
I	Water, deionised {RoW}| water production, deionised | APOS, S	0.785437	kg			600 ml used per 480 g iodine
P	Electricity, medium voltage {DE}| market for | APOS, S	5.6099e-05	kWh			Stirring, 3 hours
P	Electricity, medium voltage {DE}| market for | APOS, S	2.4179e-05	kWh			Pumping
P	Natural gas	0.49416	MJ			Heating to 126 C, at which 57% HI is collected
P	Chemical factory, organics {GLO}| market for | APOS, S	4e-10	unit
Emissions
E	Heat, waste	0.000289001
E	Hydrogen sulfide	3.37683e-05	kg			0.2% fugitive emissions, rest scrubbed off
E	Hydrogen	8.91245e-06	kg
Emissions to water
E	Hazardous waste, for incineration {Europe without Switzerland}| market for hazardous waste, for incineration | APOS, S	0.439612	kg			Distilled portion that isn't collected
Methylammonium iodide				[28-35]
Type	Process	Amount	Unit	Source	Own process	Comment
O	Methylammonium iodide	1	kg
I	Hydroiodic acid (57% in water)	1.45528	kg		yes
I	Methylamine {RER} | market for | APOS, S	0.201361	kg
I	Ethanol, without water, in 99.7% solution state, from ethylene {RER}| market for ethanol, without water, in 99.7% solution state, from ethylene | APOS, S	0.408823	kg		67% weight in methylammine solution.
I	Diethyl ether {RER} | market for | APOS, S	3.565	kg
P	Heat, natural gas, at industrial furnace >100kW/RER S	0.222483	MJ		Evaporation (without diethyl ether) 50 C, 1h,
P	Heat, natural gas, at industrial furnace >100kW/RER S	0.341592	MJ		Heating at 60 oC for 16 hours. Assumed to be mostly ethanol that makes up moisture content in MAI, as ethanol binds better than diethyl ether to MAI at lower temperatures.
P	Electricity, medium voltage {DE}| market for | APOS, S	0.0576991	kWh		Stirring initial solution 2 hours at 0 oC (no diethyl ether)
P	Electricity, medium voltage {DE}| market for | APOS, S	0.01	kWh		filtration, only MAI and diethyl ether, diethyl ether added after first evaporation
P	Electricity, medium voltage {DE}| market for | APOS, S	8.6021e-05	kWh		Pumping
P	Electricity, medium voltage {DE}| market for | APOS, S	2.95395	kWh		vacuum pump, 16 hours, assuming 0.11m3 to be evacuated, Assuming it takes 10 minutes to reach initial vacuum
P	Chemical factory, organics {GLO}| market for | APOS, S	4e-10	unit
Emissions to air
E	Heat, waste	10.8782	MJ
E	Ethanol	0.000817646	kg			0.2% fugitive emissions
E	Diethyl ether	0.00713
E	Hydrogen iodide	8.29509e-05	kg			0.2% fugitive emissions
Waste
W	Ethanol incineration	0.408006	kg			Assumed to go to incineration
W	Diethyl ether incineration	3.55787	kg		Yes	Assumed to go to incineration
W	Hazardous waste incineration	0.663769	kg			Remainder of reaction products and unreacted products
Carbon related chemicals
Benzyl bromide synthesis				[36]
Type	Process	Amount	Unit	Source	Own process	Comment
O	Benzyl bromide	1	kg
I	Toluene, liquid {RER}| market for toluene, liquid | APOS, S	0.538704	kg
I	Bromine {GLO}| market for | APOS, S	0.467166	kg
P	Heat, natural gas, at industrial furnace >100kW/RER S	2.76022	MJ
P	Electricity, low voltage {SE}| market for | APOS, S	0.572742	kWh
P	Steam, in chemical industry {RER}| market for steam, in chemical industry | APOS, S	0.0660869	kg
P	Chemical factory, organics {GLO}| market for | APOS, S	4.1e-10	unit
Waste
W	Waste, heat	1.2	MJ
Hydrobromic acid synthesis				[37]
Type	Process	Amount	Unit	Source	Own process	Comment
O	Hydrobromic acid	1	kg
I	Hydrogen, liquid {RER}| market for | APOS, S	0.00877178	kg
I	Bromine {GLO}| market for | APOS, S	1.04386	kg
P	Electricity, Medium voltage {SE}| market for | APOS, S	0.33	kWh
P	Chemical factory, organics {GLO}| market for | APOS, S	4e-10	unit
Emission to air
E	Chlorine	0.0019	kg
W	Heat, waste	1.2	MJ
n-butyl bromide (bromobuthane)				[37]
Type	Process	Amount	Unit	Source	Own process	Comment
O	n-butyl bromide	1	kg
I	1-butanol {GLO}| market for | APOS, S	0.552156	kg
I	Hydrobromic acid production	0.607789	kg		yes
P	Heat, natural gas, at industrial furnace >100kW/RER S	0.442281	MJ
P	Electricity, Medium voltage {SE}| market for | APOS, S	0.065995	kWh
P	Electricity, medium voltage {DE}| market for | APOS, S	1.77214e-05	kWh			Pumping, assumed that all liquid mass is transfered once.
P	Chemical factory, organics {GLO}| market for | APOS, S	4e-10	unit
Waste
E	Heat, waste	0.237582	MJ
n-butyl-lithium				[38]
Type	Process	Amount	Unit	Source	Own process	Comment
O	n-butyl-lithium	1	kg
O	Lithiumbromide	0.949156	kg
I	n-butyl bromide	1.78917	kg		yes
I	Diethyl ether, without water, in 99.95% solution state {RER}| market for diethyl ether, without water, in 99.95% solution state | APOS, S	1.8623	kg
I	Lithium {GLO}| market for | APOS, S	0.181267	kg
P	Electricity, Medium voltage {SE}| market for | APOS, S	2.70956e-05	kWh			stirring, 1.25 hours, assumed to be stirred per liter
P	Electricity, Medium voltage {SE}| market for | APOS, S	0.030918	kWh			ice bath (-20C, 30 mins)
P	Electricity, medium voltage {DE}| market for | APOS, S	5.85557e-05	kWh			Pumping
P	Chemical factory, organics {GLO}| market for | APOS, S	4e-10	unit
Emissions to air
E	Heat, waste	0.111613	MJ
Waste
W	Hazardous waste, for incineration {Europe without Switzerland}| market for hazardous waste, for incineration | APOS, S	0.321181	kg			n-butyl bromide. Lithium assumed to be recovered
W	diethyl ether waste incineration (electricity)	1.8623	kg			Assumed to be incinerated
Pentylbenzene production				[38]
Type	Process	Amount	Unit	Source	Own process	Comment
O	Pentylbenzene	1	kg
O	Lithium bromide	0.616674	kg
I	Benzyl bromide	1.21453	kg		yes
I	n-Buthyllithium	0.454613	kg		yes
P	Electricity, medium voltage {DE}| market for | APOS, S	2.55008e-05	kWh			Pumping, assumed that all liquid mass is transfered once.
P	Chemical factory, organics {GLO}| market for | APOS, S	4e-10	unit
Emissions to air
E	Heat, waste	9.18029e-05	MJ
Energy						Reaction is exothermic, no energy requiring inputs mentioned in [38], so no energy assumed to be required for formation
Transport						Taken into account at formation of benzyl bromine and n-buthyllithium, assumed to be produced at same facility
2-Ethoxyethanol				[39]
Type	Process	Amount	Unit	Source	Own process	Comment
O	2-ethoxyethanol	1	kg
I	Ethylene oxide {RER}| market for ethylene oxide | APOS, S	0.514519	kg
I	Ethanol, without water, in 99.7% solution state, from ethylene {RER}| market for ethanol, without water, in 99.7% solution state, from ethylene | APOS, S	0.538113	kg			molar mass 46.07 g/mol
I	Heat, natural gas, at industrial furnace >100kW/RER S	2.99813	MJ
I	Electricity, Medium voltage {SE}| market for | APOS, S	0.572742	kWh
P	Chemical factory, organics {GLO}| market for | APOS, S	4e-10	unit
Emissions to air
E	Ethylene oxide	5.14519e-05	kg
E	Ethanol	5.38113e-05	kg
E	Heat, waste	2.06187	MJ
Emissions to water
W	Ethylene oxide	0.0256745	kg
Waste
W	Ethanol waste incineration	0.0269056	kg
2-Ethoxyethanol				[40]
Type	Process	Amount	Unit	Source	Own process	Comment
O	2-(2-ethoxyethoxy)ethyl acetate	1	kg
I	Ethylene oxide	0.276993	kg
I	2-ethoxyethanol	0.566687	kg
I	Acetic acid, without water, in 98% solution state {GLO}| market for | APOS, S	0.358735	kg
P	Heat, natural gas, at industrial furnace >100kW/RER S	5.52043	MJ
P	Electricity, Medium voltage {SE}| market for | APOS, S	1.14548	kWh
P	Steam, in chemical industry {RER}| market for steam, in chemical industry | APOS, S	0.173027	kg
P	Chemical factory, organics {GLO}| market for | APOS, S	4e-10	unit
Emissions to air
E	Ethylene oxide	2.63143e-05	kg			0.2% fugitive emissions, rest scrubbed
E	Acetic acid, without water, in 98% solution state {GLO}| market for | APOS, S	3.58735e-05	kg			0.2% fugitive emissions
E	Heat	4.12374	MJ
Emissions to water
E	Ethylene oxide	0.0131308	kg
E	2-ethoxyethanol	0.0269176	kg			2-ethoxyethanol, Diethylene glycol monoethyl ether and acetic acid
E	water	0.107618	kg
E	Acetic acid, without water, in 98% solution state {GLO}| market for | APOS, S	0.0179009	kg
E	Diethylene glycol monoethyl ether	0.0526316	kg
2-Ethoxyethanol				[42]
Type	Process	Amount	Unit	Source	Own process	Comment
O	Carbon paste	1	kg
I	Carbon black {GLO}| market for | APOS, S	0.0416667	kg
I	Graphite {GLO}| market for | APOS, S	0.108333	kg
I	2-(2-ethoxyethoxy)ethyl acetate	0.37	kg		yes
I	Coal tar {RoW}| coking | APOS, S	0.24	kg	[390]		Used as a proxy for 2-methylnaphtalene, as coal tar contains 1.5% 2-methylnaphtalene
I	Pentyl benzene	0.24	kg		yes
Transport
P	Transport, freight train {RER}| market group for transport, freight train | APOS, S	0.51	tkm
P	Transport, freight, lorry 16-32 metric ton, euro6 {RER}| market for transport, freight, lorry 16-32 metric ton, EURO6 | APOS, S	0.085	tkm
Nitrocellulose				[43]
Type	Process	Amount	Unit	Source	Own process	Comment
O	Nitrocellulose	1	kg
I	Cellulose fibre, inclusive blowing in {GLO}| market for | APOS, S	0.641964	kg
I	Nitric acid, without water, in 50% solution state {RER}| market for nitric acid, without water, in 50% solution state | APOS, S	0.748428	kg			Also sulfuric acid, but only used as catalyst, so not included
P	Natural gas, burned in industrial furnace >100kW/RER S	0.255097	MJ			Heating, 100 C 2 hours
P	Electricity, medium voltage	2.12421e-05	kWh			Pumping
P	Chemical factory, organics {GLO}| market for | APOS, S	4e-10	unit
Emissions to air
E	Heat, waste	7.64716e-05	MJ
Waste
W	Hazardous waste, for incineration {Europe without Switzerland}| market for hazardous waste, for incineration | APOS, S	0.39032	kg

## Sheet: electricity consumption
density air			Compressed dry air	[53]
1.2041	kg/m3		0.124533	kWh/m3
Energy for heating (conveyor belt furnaces)
	Power	Temperature	Conveyor length	Source
	kW	oC	m
	20	200	14.1	[53]
	35	850	14.1	[83]
	15	850	4.7	[89]
		Power increase from 200 to 850 C
	Log	P = 14.514ln(x) - 69.898
	Linear	P = 0.0323x + 0.5385
	Exponential	P = 4.5693e^(0.0021x)
Different temperatures
			Power (kWh/h)
		Temp (C)	Normal (linear increase)	low estimate (exponential)	high estimate (log)
Actual numbers		200	13
		850	28
Estimates	Only heat	450	15.0735	11.756	18.7716
		400	13.4585	10.5842	17.0621
		500	16.6885	13.0575	20.3008
	Total	400	20.4585	17.5842	24.0621
		450	22.0735	18.756	25.7716
		500	23.6885	20.0575	27.3008
Different Heating lenghts
	Heating length (m)	850 C	400 C	450 C	500 C
	4.7	15	8.76793	9.46007	10.1522
	7	23	13.4442	14.5054	15.5667
	15	35	20.4585	22.0735	23.6885
	25	50	29.2264	31.5336	33.8407
	35	62.5	36.533	39.417	42.3009
		Actual data			Estimates
Temp and heating time	Units	200 C, 10 min	850C, 30 min	850C, 30 min	450 C, 30 mins	100C, 10 mins	120C, 10 mins	100C, 2 minutes	500C, 30 minutes	400C, 30 minutes	Comment
Throughput	m2/h	132.269	88.1792	28.9338	88.1792	88.1792	88.1792	88.1792	88.1792	88.1792
Operation time	h/y	7680	7680	7680	7680	7680	7680	7680	7680	7680
Length	m	14.1	35	14.1	35	14.1	14.1	4.7	35	35
Width	m	2.4	2.4	2.4	2.4	2.4	2.4	2.4	2.4	2.4
Theoretical throughput	m2	152.28	126	50.76	126	152.28	152.28		126	126	Based on 3 modules (0.6m width) next to each other
Electricity	kWh/h	20	65	35	39.417	20	20	5.15124	42.3009	36.533	Difference between 200C, 100C and 120C assumed negligible (as the heating part of electricity consumption is quite low there). For electricity and compressed air, efficiency is assumed to drop by 10% based on the lower output than theoretically possible for perovskite an d carbon layer (to match the throughput of the m-tio2 process <-- not yet implemented (Alternatively, can choose shorter heatin…
General exhaust	m3/h	2200	2965.04	2965.04	2965.04	2965.04	2965.04	2965.04	2965.04	2965.04
Compressed dry air	m3/h	60	235.714	132	142	60	60	25.7143	153.714	130.286	Same scaling used as for power output (65/35 from 15 to 35 length). For temperature related increase in CDA, linear scaling used.
Electricity use per m2	kWh/m2	0.151207	0.737135	1.20966	0.44701	0.226811	0.226811	0.0584178	0.479715	0.414304
CDA per m2	m3/m2	0.453622	2.67313	4.56214	1.61036	0.680433	0.680433	0.291614	1.7432	1.47751
CDA per m2	kWh/m2	0.0564909	0.332893	0.568137	0.200543	0.0847363	0.0847363	0.0363156	0.217086	0.183999
Cooling water	kg/h	0	5957.45	2400	2291.33	0	0		2749.59	1833.06	Water consumption linearly scaled from 200 C (no cooling water used until 200 C). For the extra length it is scaled linearly
Cooling water	kg/m2		47.2813	47.2813	18.1851	0	0		21.8221	14.5481
Source		Lorentz Friedrich	[83]	[83]
	Glove box	[84]
Power	500	W	maximum
Power	40	W	energy saving mode
Nitrogen	0.39	m3/h	6,5 l/m
Other machines used for PSM production
Slot-die coating	[76]
Speed	0.02-2.5	m/min	0.25 m working width
Drying temperature	140	C
Working oven power	12	kW
Working slot die power	1.5	kW
Lamination	[77]
Throughput	30-60	modules/h, max 1.1x2.05m, 46 for POE (roughly 15 to 25 minute cycle time)
power	93	kWh/h
Compressed air	1	NL/1'( normal litre per???)
Power	0.986214	kWh/m2	Based on 46 throughput of 1.1x2.05m, power consumption scaled down to 1.2x0.6m2 modules as these machines are custom made based on the customer's wishes, 10% increase in power consumption per m2 assumed for the smaller area
Inkjet printing	[53]
Throughput	2400	Cells/h	Cells 0.025825m2
Power	2	kWh/h
Power	0.0322685	kWh/m2
Isopropanol	0.45514	L/m2
Printheads	1.47345e-05	units/m2	Consumable, Inkjet printhead SAMBA G3L
Screen printing	[53]
Throughput	7200	Cells/h	Cells 0.025825m2
Power	0.0134452	kWh/m2
Cooling water	2	m3/h
Cooling water	10.7562	kg/m2
Compressed dry air	35	m3/h
Compressed dry air	0.188233	m3/m2
Compressed dry air	0.0234412	kWh/m2
Spray pyrolysis	[85]
	Cost	Uncertainty	Floorspace	Electricity usage	Uncertainty	Throughput	Uncertainty	Source (electricity and cost)	Source (throughput)
Equipment	$M		m2	kW		m2/h
Spray pyrolysis	0.3	0.2-0.5	10, 8-15	10	~5-20	17	14-20	(estimated), rest have sources	Matteocci F, Mincuzzi G, Giordano F, Capasso A, Artuso E, Barolo C, Viscardi G, Brown T, Reale A, Di Carlo A. Blocking layer optimisation of poly (3‐hexylthiopene) based solid state dye sensitized solar cells. Organic Electronics 2013; 14(7):1882–1890.
Laser scribing		[75]
Equipment/process	Number	Footprint (mxm)	Unit price ($k)	Power (kW)	Operating time (min/module)
Laser scribing	3	6x2.5	30-90	2	2.5
Energy use for production of chemicals
	Stirring (small scale)	[86]						Stirring on large scale	[11]
Power use			Max capacity	max T	Speed				Volume (m3)	0.11	0.55	1.1	5.5	11
W			L	C	rpm				Capacity (L)	100	500	1000	5000	10000
Including heating	Only stirring	60 C with stirring					Physical entity		Unit
1050	50	158.621	20	580	100-1500		Impeller diameter		m	0.173	0.296	0.373	0.638	0.803
530	30	120.857	20	350	0-1500		Power number of impeller	Axial flow		0.79	0.79	0.79	0.79	0.79
515	15	111.562	3	320	100-1500			Radial flow		3.44	3.44	3.44	3.44	3.44
490	20	230	4	140	0-1100		Rotational speed of agitator		1/s	3.052	1.785	1.417	0.828	0.658
530	30						Efficiency of agitator		%	0.9	0.9	0.9	0.9	0.9
							Stirring Energy		Wh/hour/kg/l	0.0386695	0.0226876	0.0180318	0.0105344	0.00834911
	Miscellaneous	[11]
		Conservative estimate
Filtration/Centrifugation	~1-10	10	Wh/kg	Small particles/pastes more energy intensive, larger ones less
Grinding	~8-16	16	Wh/kg
Distillation	0.81-2.81	1.53	kg steam/kg solvent	They present equations to do it more exactly if solvents etc. are known, heat loss 10%
Distillation	0.027		kg water/kg waste solvent
Pumping (transfer of liquids)	55	J/kg
	Heat loss in chemical reactors	[11]
Reactor size	Heat loss	Heating efficiency
L	W/K/L (Watt per Kelvin per liter)
100L	0.00712	0.72
500L	0.004162	0.74
1000L	0.003303	0.75
5000L	0.0019318	0.77
10000L	0.015333	0.79
Standard chemical average assumptions from gendorf			[87]		Total energy use gendorf [85]	GJ	% of total
Energy use	5.06	MJ/kg product			Natural gas	4608700	0.543363
Natural gas	2.76022	MJ/kg product	NG assumed for internal waste		Electricity	3456200	0.407484
Electricity	2.06187	MJ/kg product			Steam	398800	0.0470183
Steam	0.237913	MJ/kg product			Internal waste treatment	18100	0.00213398
Water use	25.19	liter/kg product			total	8481800
COP	Cooling/freezing	[88]
Cooler	2.28	Assumed till 0 C
Freezer	1.43	Below 0 C

## Sheet: OVERHEAD
Machines needed		Assuming 2 lines					Working and handling (additional space for handling equipment and working space)										(Rough) Assumptions, based on[53]
Machine	Amount needed per line	Throughput per machiine	Width	Length	Height	Area per machine	Add to width	Add to length	Total Area including working space/handling								Line total length 105m, assumed to consist of three parallel segments of 35m
	#	m2/hour	m	m	m	m2	m	m	m2	Source	Comment						On outer most machines, an extra width and length (one side) of 3m is assumed --> one segment of 35m total has this for width, all equipment next to the wall has this for length
Glass washing	2	270	2.1	7.37	2.73	15.477	5	5	175.654	[73]	For FTO glass and back sheet washing						Between parallel equipment in a cluster, 4m (2m on each side of equipment)
TiO2 sputtering	1	90	2.2	5.7	2.2	12.54	5	4	69.84	(T.Kroyer, personal communication, April 9, 2021) & [53]	Throughput Based on 30 nm TiO2, can be up to 10 times faster on industrial machine						Between "series" connected equipment, 4m is assumed (2m on each side) for handling equipment (e.g. conveyor belts that connects them, where modules can also wait and rest between stages)
Laser scribing	3	88.2	3	6	3	18	5	4	240	[74],[75]
Screen printer	1	188.258	1.4	6.4	1.5	8.96	5	4	66.56	[53]
Slot die coater	2	150	2	4	2	8	5	5	126	Throughput from [76]	Size based on blade coater from [75]
Conveyor oven, m-TiO2	1	88.1792	2.4	35	3	84	4	6	262.4	[53]
Conveyor oven, perovskite & carbon	2	88.1792	2.4	14.1	3	33.84	4	5	244.48	[53]
Lamination machine	2	51.84	1.58182	14.2244	1.7	22.5004	4	4	203.45	[77]	Scaled down from [77]
Bus bar attach	1	89.153	2.5	5	2	12.5	4	4	58.5	[78] throughput, [79] dimensions
J-box attach	1	89.153	2.5	2.5	2	6.25	4	4	42.25	[78] throughput and dimensions
Testing	1	89.153	1	2.5	2	2.5	5	4	39	[78] throughput, [79] dimensions
Packing	1	89.153	2.5	2.5	2	6.25	5	5	56.25	[78] throughput and dimensions
Total net manufacturing area			25.5818	105.294		230.817			1584.38
Total gross manufacturing area per line							4	4	1918.82		Add 4 m width and length to total [53]
Total gross manufacturing area(2 lines)									3837.64
Support area									383.764		10% of gross [308]
Logistics area									383.764		10% of gross [308]
Facility area									575.646		15% of gross [308]
Administration area									383.764		10% of gross [308]
Total building area									5564.58
Electricity use [53]
	Area	Electricity	Electricity	Electricity
	m2	Wh/m2/h	kWh/h	kWh/m2
Heating, ventilation and airconditioning
Gross manufacturing area	3837.64	100	383.764	2.17605
Support, logistic, administration and facility areas	1726.94	30	51.8081	0.293766
Lighting etc.
Gross manufacturing area	3837.64	30	115.129	0.645683
Support, logistic, administration and facility areas	1726.94	20	34.5387	0.193705
Total	5564.58		435.572	3.3092

## Sheet: Chemicals & Solvents background
	Molar mass	Density		Boiling point	Heat of vaporization	Heat capacity		Energy to vapor (25 C ambient)	Energy to vapor (20 Cambient)
	g/mol	kg/dm3	Source	C	kJ/kg	kJ/kg.k	Source	kJ/kg	kJ/kg
Solvents
Isopropanol	60.096	0.786	wiki	82.5	753.794	1.54	NIST	842.344	850.044
Methanol	32.042	0.791	wiki	78.23	1173.46	2.53792	NIST	1308.55	1321.24
Ethanol	46.07	0.79	wiki	64.7	918.168	2.46	NIST	1015.83	1028.13
DMF	73.09	0.944	wiki	153	775.756	1.99822	NIST	1031.53	1041.52
DMSO	78.13	1.1	wiki	189	677.077	1.9494	NIST	996.778	1006.52
Toluene	92.14	0.865	wiki	110.6	401.563	1.70491	NIST	547.503	556.027
Diethyl ether	74.12	0.713	wiki	34.6	365.623	2.32056	NIST	387.901	399.504
Benzene	78.11	0.876	wiki	80.1	422.481	1.73717	NIST	518.199	526.885
Butanol	74.121	0.81	wiki	117.7	584.045	2.47298	NIST	813.291	825.655
Water				100	2257	4.184	NIST
Sulfurica cid	98.079	1.83		158.39	570.968	2.98739	Pubchem
y-Butyrolactone	86.09	1.1296	at 20 C, wiki
Other chemicals
Potassium iodide	166.003					0.313	Pubchem
Isobutylene	56.1063					48.5151	1.47434	NIST																	P	Transport, freight, lorry 16-32 metric ton, euro6 {RER}| market for transport, freight, lorry 16-32 metric ton, EURO6 | APOS, S	0	t*km	100 km as conservative estimate for the travel from chemical plant to waste incineration
Solvents incineration
Solvent LHVs					Incineration LCIs
Solvent	LHV (MJ/kg)	Source			Ethanol waste incineration
Diethyl ether	33.867	[80]					Value	Unit
Ethanol	26.7	PubChem			O	Ethanol incinerated	1	kg
Ethyl benzene	40.938	PubChem			O	Heat, from steam, in chemical industry {RER}| steam production, as energy carrier, in chemical industry | APOS, S	3	MJ
Isopropanol	30.447	PubChem			W	Spent solvent mixture {Europe without Switzerland}| treatment of spent solvent mixture, hazardous waste incineration, with energy recovery | APOS, S	1	kg
Methanol	21.104	[81]			Transport
Toluene	40.589	PubChem			P	Transport, freight, lorry 16-32 metric ton, euro6 {RER}| market for transport, freight, lorry 16-32 metric ton, EURO6 | APOS, S	0.1	t*km
Acetone	28.548	PubChem
DMF	23.751	PubChem			Diethyl ether waste incineration
DMSO	22.7613	PubChem			O	Diethyl ether incinerated	1	kg
Benzene	40.17	PubChem			O	Heat, from steam, in chemical industry {RER}| steam production, as energy carrier, in chemical industry | APOS, S	7.3002	MJ
Butanol	34.4	PubChem			W	Spent solvent mixture {Europe without Switzerland}| treatment of spent solvent mixture, hazardous waste incineration, with energy recovery | APOS, S	1	kg
Ethyl acetate	21.34	[82]			Transport
Chlorobenzene	27.6297	PubChem			P	Transport, freight, lorry 16-32 metric ton, euro6 {RER}| market for transport, freight, lorry 16-32 metric ton, EURO6 | APOS, S	0.1	t*km
	Average from simapro processes				Toluene waste incineration
Spent solvent mixture {Europe without Switzerland}| treatment of spent solvent mixture, hazardous waste incineration, with energy recovery | APOS, S	21.7	MJ/kg	LHV		O	Toluene incinerated	1	kg
					O	Heat, from steam, in chemical industry {RER}| steam production, as energy carrier, in chemical industry | APOS, S	11.3334	MJ
					W	Spent solvent mixture {Europe without Switzerland}| treatment of spent solvent mixture, hazardous waste incineration, with energy recovery | APOS, S	1	kg
					Transport
					P	Transport, freight, lorry 16-32 metric ton, euro6 {RER}| market for transport, freight, lorry 16-32 metric ton, EURO6 | APOS, S	0.1	t*km
					Isopropanol waste incineration
					O	Isopropanol incineration	1	kg
					O	Heat, from steam, in chemical industry {RER}| steam production, as energy carrier, in chemical industry | APOS, S	5.2482	MJ
					W	Spent solvent mixture {Europe without Switzerland}| treatment of spent solvent mixture, hazardous waste incineration, with energy recovery | APOS, S	1	kg
					Transport
					P	Transport, freight, lorry 16-32 metric ton, euro6 {RER}| market for transport, freight, lorry 16-32 metric ton, EURO6 | APOS, S	0.1	t*km
					Methanol waste incineration
					O	Methanol incinerated	1	kg
					O	Heat, from steam, in chemical industry {RER}| steam production, as energy carrier, in chemical industry | APOS, S	-0.3576	MJ
					W	Spent solvent mixture {Europe without Switzerland}| treatment of spent solvent mixture, hazardous waste incineration, with energy recovery | APOS, S	1	kg
					Transport
					P	Transport, freight, lorry 16-32 metric ton, euro6 {RER}| market for transport, freight, lorry 16-32 metric ton, EURO6 | APOS, S	0.1	t*km
					Ethyl acetate incineration
					O	Ethyl acetate	1	kg
					O	Heat, from steam, in chemical industry {RER}| steam production, as energy carrier, in chemical industry | APOS, S	-0.216	MJ
					W	Spent solvent mixture {Europe without Switzerland}| treatment of spent solvent mixture, hazardous waste incineration, with energy recovery | APOS, S	1	kg
					Transport
					P	Transport, freight, lorry 16-32 metric ton, euro6 {RER}| market for transport, freight, lorry 16-32 metric ton, EURO6 | APOS, S	0.1	t*km
					DMF waste incineration
					O	DMF incinerated	1	kg
					O	Heat, from steam, in chemical industry {RER}| steam production, as energy carrier, in chemical industry | APOS, S	1.23059	MJ
					W	Spent solvent mixture {Europe without Switzerland}| treatment of spent solvent mixture, hazardous waste incineration | APOS, S	1	kg
					Transport
					P	Transport, freight, lorry 16-32 metric ton, euro6 {RER}| market for transport, freight, lorry 16-32 metric ton, EURO6 | APOS, S	0.1	t*km
					DMSO waste incineration
					O	DMSO incinerated	1	kg
					O	Heat, from steam, in chemical industry {RER}| steam production, as energy carrier, in chemical industry | APOS, S	0.636781	MJ
					W	Spent solvent mixture {Europe without Switzerland}| treatment of spent solvent mixture, hazardous waste incineration | APOS, S	1	kg
					Transport
					P	Transport, freight, lorry 16-32 metric ton, euro6 {RER}| market for transport, freight, lorry 16-32 metric ton, EURO6 | APOS, S	0.1	t*km
					Benzene waste incineration
					O	Benzene incineration	1	kg
					O	Heat, from steam, in chemical industry {RER}| steam production, as energy carrier, in chemical industry | APOS, S	11.082	MJ
					W	Spent solvent mixture {Europe without Switzerland}| treatment of spent solvent mixture, hazardous waste incineration | APOS, S	1	kg
					Transport
					P	Transport, freight, lorry 16-32 metric ton, euro6 {RER}| market for transport, freight, lorry 16-32 metric ton, EURO6 | APOS, S	0.1	t*km
					Butanol waste incineration
					O	Butanol incineration	1	kg
					O	Heat, from steam, in chemical industry {RER}| steam production, as energy carrier, in chemical industry | APOS, S	7.62	MJ
					W	Spent solvent mixture {Europe without Switzerland}| treatment of spent solvent mixture, hazardous waste incineration | APOS, S	1	kg
					Transport
					P	Transport, freight, lorry 16-32 metric ton, euro6 {RER}| market for transport, freight, lorry 16-32 metric ton, EURO6 | APOS, S	0.1	t*km
					Acetone incineration
					O	Acetone incineration	1	kg
					O	Heat, from steam, in chemical industry {RER}| steam production, as energy carrier, in chemical industry | APOS, S	4.1088	MJ
					W	Spent solvent mixture {Europe without Switzerland}| treatment of spent solvent mixture, hazardous waste incineration | APOS, S	1	kg
					Transport
					P	Transport, freight, lorry 16-32 metric ton, euro6 {RER}| market for transport, freight, lorry 16-32 metric ton, EURO6 | APOS, S	0.1	t*km
					Chlorobenzene
					O	Chlorobenzene incineration	1	kg
					O	Heat, from steam, in chemical industry {RER}| steam production, as energy carrier, in chemical industry | APOS, S	3.55783	MJ
					W	Spent solvent mixture {Europe without Switzerland}| treatment of spent solvent mixture, hazardous waste incineration | APOS, S	1	kg
					Transport
					P	Transport, freight, lorry 16-32 metric ton, euro6 {RER}| market for transport, freight, lorry 16-32 metric ton, EURO6 | APOS, S	0.1	t*km
Perovskite solvents ratio
	molar mass g/mol	density g/cm3	Source
MAI	158.97	1	https://doi.org/10.1016/j.joule.2020.02.001
PbI2	461.01	6.1	https://doi.org/10.1016/j.joule.2020.02.001
MAPbI3	619.98	4.16	https://doi.org/10.1016/j.joule.2020.02.001 &
DMSO	78.13	1.1004	wiki
DMF	73.09	0.944	PubChem
molar ratio		Weight ratio		Volume ratio		Mixture density
DMF	DMSO	DMF	DMSO	DMF	DMSO
0.7	0.3	0.0426639	0.957336	0.71787	0.28213	0.988125

## Sheet: Encapsulation materials
TPO production
Type	Process	Amount	Unit	Source	Own process	Comment
O	TPO (sheet)	1	kg
I	Polyethylene, high density, granulate {RER}| production | APOS, S	1.024	kg			0.024 kg loss according to ecoinvent
P	Extrusion, plastic film {RER}| extrusion, plastic film | APOS, S	1.024	kg
Waste
W	Waste plastic, mixture {DE}| market for waste plastic, mixture | APOS, S	0.024	kg
Isobutylene production
Type	Process	Amount	Unit	Source	Own process	Comment
O	Isobutylene	1	kg
O	Acetone, liquid {RER}| production | APOS, S	0.03	kg			byproduct
I	Propylene oxide, liquid {RER}| market for propylene oxide, liquid | APOS, S	0.302222	kg			1.36 kg tert-butyl-alcohol needed for 1 kg isobutylene. No Ecoinvent ata available, so propylene oxide used as proxy. 3-4 kg (assumed 3.5) tert-butylalcohol produced per kg propylene oxide as by-product (allocated as such)
I	Zeolite, powder {GLO}| market for | APOS, S	0.071	kg			between 22-120 g, average assumed
I	Phosphoric acid, industrial grade, without water, in 85% solution state {GLO}| market for | APOS, S	0.418	kg			Between 0.271 and 0.565 kg, average assumed
P	Process steam from natural gas, heat plant, consumption mix, at plant, MJ DE S	14.21	MJ
P	Electricity, medium voltage {DE}| market for | APOS, S	0.06	kWh
P	Tap water {Europe without Switzerland}| market for | APOS, S	173.5	kg			Cooling water
P	Chemical factory, organics {GLO}| market for | APOS, S	4e-10	unit
Emissions to air
E	Waste, heat	0.216	MJ
PIB with desiccant production
Type	Process	Amount	Unit	Source	Own process	Comment
O	PIB with desiccant	1	kg
I	Isobutylene	0.775	kg
I	Quicklime, milled, packed {RER}| market for quicklime, milled, packed | APOS, S	0.225	kg
P	Electricity, medium voltage {DE}| market for | APOS, S	0.0266344	kWh	Cooling to -100 C

## Sheet: Sources
1	M. P. Tsang, G. W. Sonnemann, and D. M. Bassani, “A comparative human health, ecotoxicity, and product environmental assessment on the production of organic and silicon solar cells,” Prog. Photovolt. Res. Appl., vol. 24, no. 5, pp. 645–655, 2016, doi: https://doi.org/10.1002/pip.2704.
2	M. Bohnet, Ullmann’s encyclopedia of industrial chemistry. Weinheim: Wiley-VCH, 2003.
3	A. Pfennig, “Kirk-Othmer Encyclopedia of Chemical Technology, Vol. 1. Herausgeg. von J. I. Kroschwitz und M. Howe-Grant. John Wiley & Sons, New York - Chichester - Toronto 1991.4. Aufl., XXXII, 1087 S., zahlr. Abb. u. Tab., geb., Subskriptionspreis US-$ 225,–,” Chem. Ing. Tech., vol. 64, no. 12, pp. 1134–1134, 1992, doi: https://doi.org/10.1002/cite.330641225.
4	J.-A. Alberola-Borràs et al., “Perovskite Photovoltaic Modules: Life Cycle Assessment of Pre-industrial Production Process,” iScience, vol. 9, pp. 542–551, Nov. 2018, doi: 10.1016/j.isci.2018.10.020.
5	M. A. Behnajady, H. Eskandarloo, N. Modirshahla, and M. Shokri, “Investigation of the effect of sol–gel synthesis variables on structural and photocatalytic properties of TiO2 nanoparticles,” Desalination, vol. 278, no. 1, pp. 10–17, Sep. 2011, doi: 10.1016/j.desal.2011.04.019.
6	F. Wu, Z. Zhou, and A. L. Hicks, “Life Cycle Impact of Titanium Dioxide Nanoparticle Synthesis through Physical, Chemical, and Biological Routes,” Environ. Sci. Technol., vol. 53, no. 8, pp. 4078–4087, Apr. 2019, doi: 10.1021/acs.est.8b06800.
7	S. Middlemas, Z. Z. Fang, and P. Fan, “Life cycle assessment comparison of emerging and traditional Titanium dioxide manufacturing processes,” J. Clean. Prod., vol. 89, pp. 137–147, Feb. 2015, doi: 10.1016/j.jclepro.2014.11.019.
8	M. Dehara, “Synthesis of Ketene by the Pyrolysis of Acetone. I,” J. Synth. Org. Chem. Jpn., vol. 20, no. 8, pp. 730–737, 1962, doi: 10.5059/yukigoseikyokaishi.20.730.
9	C. D. Hurd, “KETENE,” Org. Synth., vol. 4, p. 39, 1925, doi: 10.15227/orgsyn.004.0039.
10	H. J. Hagemeyer and D. C. Hull, “Reactions of Isopropenyl Acetate,” Ind. Eng. Chem., vol. 41, no. 12, pp. 2920–2924, Dec. 1949, doi: 10.1021/ie50480a063.
11	F. Piccinno, R. Hischier, S. Seeger, and C. Som, “From laboratory to industrial scale: a scale-up framework for chemical processes in life cycle assessment studies,” J. Clean. Prod., vol. 135, pp. 1085–1097, Nov. 2016, doi: 10.1016/j.jclepro.2016.06.164.
12	H. Spes, G. Kunstle, and H. Siegl, “Process for continuously producing acetylacetone,” US3794686A, Feb. 26, 1974.
13	L. Kavan and M. Grätzel, “Highly efficient semiconducting TiO2 photoelectrodes prepared by aerosol pyrolysis,” Electrochimica Acta, vol. 40, no. 5, pp. 643–652, Apr. 1995, doi: 10.1016/0013-4686(95)90400-W.
14	J. Spiridonova, A. Katerski, M. Danilson, M. Krichevskaya, M. Krunks, and I. Oja Acik, “Effect of the Titanium Isopropoxide:Acetylacetone Molar Ratio on the Photocatalytic Activity of TiO2 Thin Films,” Molecules, vol. 24, no. 23, Art. no. 23, Jan. 2019, doi: 10.3390/molecules24234326.
15	X. Ding et al., “Sequential deposition method fabricating carbonbased fully-inorganic perovskite solar cells,” Sci. China Mater., vol. 61, no. 1, pp. 73–79, Jan. 2018, doi: 10.1007/s40843-017-9117-4.
16	GreatcellSolar, “18NR-T Transparent Titania Paste.” https://www.greatcellsolarmaterials.com/18nr-t-transparent-titania-paste.html (accessed Jul. 23, 2021).
17	T. Umeyama and H. Imahori, “A chemical approach to perovskite solar cells: control of electron-transporting mesoporous TiO2 and utilization of nanocarbon materials,” Dalton Trans., vol. 46, no. 45, pp. 15615–15627, Nov. 2017, doi: 10.1039/C7DT02421E.
18	Solaronix, “Solaronix - Ti-Nanoxide, Titanium Dioxide Pastes.” https://www.solaronix.com/materials/products/tinanoxide/ (accessed Jul. 23, 2021).
19	M. Rossberg et al., “Chlorinated Hydrocarbons,” in Ullmann’s Encyclopedia of Industrial Chemistry, American Cancer Society, 2006.
20	Urbanski, T., (1964). Chemistry and technology of explosives. Volume 1. (Pergamon).
21	秦旭东, 秦怡生, 陈荣福, 王伟, and 蒋大智, “Method for preparing ethylene glycol mono-n-butyl ether by continuous pipe reaction,” CN101337864A, Jan. 07, 2009 Accessed: Jun. 12, 2022. [Online]. Available: https://patents.google.com/patent/CN101337864A/en
22	Y. Liu, Y. Wang, C. Zhai, W. Chen, and C. Qiao, “Kinetics Study of the Esterification Reaction of Diethylene Glycol Monobutyl Ether with Acetic Acid Catalyzed by Heteropolyanion-Based Ionic Liquids,” Ind. Eng. Chem. Res., vol. 53, no. 38, pp. 14633–14640, Sep. 2014, doi: 10.1021/ie502352z.
23	S. Ito et al., “Fabrication of screen-printing pastes from TiO2 powders for dye-sensitised solar cells,” Prog. Photovolt. Res. Appl., vol. 15, no. 7, pp. 603–612, 2007, doi: https://doi.org/10.1002/pip.768.
24	W. Ruckelshaus, “Development document for effluent limitations guidelines new source performance standards and pretreatment standards for the inorganic chemicals manufacturing point source category.” Sep. 1983, Accessed: Jul. 23, 2021. [Online]. Available: https://nepis.epa.gov/Exe/ZyNET.exe/000013E5.TXT?ZyActionD=ZyDocument&Client=EPA&Index=1981+Thru+1985&Docs=&Query=&Time=&EndTime=&SearchMethod…
25	IGN, “Iodine Global Network (IGN) - Iodate or iodide?” https://www.ign.org/iodate-or-iodide.htm (accessed Jul. 23, 2021).
26	D. S. Carr, “Lead Compounds,” in Ullmann’s Encyclopedia of Industrial Chemistry, American Cancer Society, 2000.
27	PubChem, “Hydriodic acid.” https://pubchem.ncbi.nlm.nih.gov/compound/24841 (accessed Jul. 23, 2021).
28	H.-S. Kim et al., “Lead Iodide Perovskite Sensitized All-Solid-State Submicron Thin Film Mesoscopic Solar Cell with Efficiency Exceeding 9%,” Sci. Rep., vol. 2, no. 1, Art. no. 1, Aug. 2012, doi: 10.1038/srep00591.
29	B. Cai, Y. Xing, Z. Yang, W.-H. Zhang, and J. Qiu, “High performance hybrid solar cells sensitized by organolead halide perovskites,” Energy Environ. Sci., vol. 6, no. 5, pp. 1480–1485, Apr. 2013, doi: 10.1039/C3EE40343B.
30	H.-S. Kim et al., “High Efficiency Solid-State Sensitized Solar Cell-Based on Submicrometer Rutile TiO2 Nanorod and CH3NH3PbI3 Perovskite Sensitizer,” Nano Lett., vol. 13, no. 6, pp. 2412–2417, Jun. 2013, doi: 10.1021/nl400286w.
31	L. Etgar et al., “Mesoscopic CH3NH3PbI3/TiO2 heterojunction solar cells,” J. Am. Chem. Soc., vol. 134, no. 42, pp. 17396–17399, Oct. 2012, doi: 10.1021/ja307789s.
32	J. H. Heo et al., “Efficient inorganic–organic hybrid heterojunction solar cells containing perovskite compound and polymeric hole conductors,” Nat. Photonics, vol. 7, no. 6, Art. no. 6, Jun. 2013, doi: 10.1038/nphoton.2013.80.
33	H. J. Snaith, “Perovskites: The Emergence of a New Era for Low-Cost, High-Efficiency Solar Cells,” J. Phys. Chem. Lett., vol. 4, no. 21, pp. 3623–3630, Nov. 2013, doi: 10.1021/jz4020162.
34	J. H. Noh, S. H. Im, J. H. Heo, T. N. Mandal, and S. I. Seok, “Chemical Management for Colorful, Efficient, and Stable Inorganic–Organic Hybrid Nanostructured Solar Cells,” Nano Lett., vol. 13, no. 4, pp. 1764–1769, Apr. 2013, doi: 10.1021/nl400349b.
35	J.-H. Im, C.-R. Lee, J.-W. Lee, S.-W. Park, and N.-G. Park, “6.5% efficient perovskite quantum-dot-sensitized solar cell,” Nanoscale, vol. 3, no. 10, pp. 4088–4093, 2011, doi: 10.1039/C1NR10867K.
36	E. Klein, R. Lesyuk, and C. Klinke, “Insights into the formation mechanism of two-dimensional lead halide nanostructures,” Nanoscale, vol. 10, no. 9, pp. 4442–4451, Mar. 2018, doi: 10.1039/C7NR09564C.
37	A. Mehrkesh, “Optimization-based design and analysis of tailor-made ionic liquids,” ArXiv161206407 Cond-Mat Physicsphysics, Dec. 2016, Accessed: Jul. 23, 2021. [Online]. Available: http://arxiv.org/abs/1612.06407.
38	S. M. Gerber and D. Y. Curtin, “The Reaction of Diazomethane with Phenols in the Presence of Propanol,” J. Am. Chem. Soc., vol. 71, no. 4, pp. 1499–1499, Apr. 1949, doi: 10.1021/ja01172a509.
39	R. K. Brown and A. M. Eastham, “THE CHEMISTRY OF ETHYLENE OXIDE: VI. THE ACID-CATALYZED REACTION OF ETHYLENE OXIDE WITH ETHANOL–WATER MIXTURES,” Can. J. Chem., Feb. 2011, doi: 10.1139/v60-277.
40	E. Browning, Toxicity and metabolism of industrial solvents. Amsterdam; New York: Elsevier, 1965.
41	S. Valastro et al., “Improved Electrical and Structural Stability in HTL-Free Perovskite Solar Cells by Vacuum Curing Treatment,” Energies, vol. 13, no. 15, Art. no. 15, Jan. 2020, doi: 10.3390/en13153953.
42	R. K. Brown and A. M. Eastham, “THE CHEMISTRY OF ETHYLENE OXIDE: VI. THE ACID-CATALYZED REACTION OF ETHYLENE OXIDE WITH ETHANOL–WATER MIXTURES,” Can. J. Chem., Feb. 2011, doi: 10.1139/v60-277.
43	“Preparation of nitrocellulose,” PrepChem.com, Nov. 22, 2019. https://prepchem.com/synthesis-of-nitrocellulose/ (accessed Jun. 12, 2022).
44	J. Brown, “Transparent Conducting Oxides - An Industrial Perspective?,” Liverpool, Nov. 2018. Accessed: Jul. 20, 201AD. [Online]. Available: https://www.cdt-pv.org/media/resources/Presentation_Liverpool_University_-_TCO_Manufacturing.pdf
45	N. Noor, C. K. T. Chew, D. S. Bhachu, M. R. Waugh, C. J. Carmalt, and I. P. Parkin, “Influencing FTO thin film growth with thin seeding layers: a route to microstructural modification,” J. Mater. Chem. C, vol. 3, no. 36, pp. 9359–9368, Sep. 2015, doi: 10.1039/C5TC02144H.
46	E. Syrrakou, S. Papaefthimiou, and P. Yianoulis, “Environmental assessment of electrochromic glazing production,” Sol. Energy Mater. Sol. Cells, vol. 85, no. 2, pp. 205–240, Jan. 2005, doi: 10.1016/j.solmat.2004.03.005.
47	M. J. Soubeyrand and A. C. Halliwell, “Method for forming tin oxide coating on glass,” US5698262A, Dec. 16, 1997 Accessed: Jul. 21, 2021. [Online]. Available: https://patents.google.com/patent/US5698262A/en
48	Flat glass represents float glass, as 95% of flat glass output in Europe was float glass, https://www.ferver.eu/sites/default/files/rapport_vlakglas_ovamhuisstijl_versie2.1.pdf
49	L. A. Hartle, “Atmospheric Pressure Chemical Vapor Deposition of Fluorine-Doped Tin Oxide and Tin-Germanium Oxide: Photovoltaic and Energy Storage Applications,” May 2018, Accessed: Jul. 25, 2021. [Online]. Available: https://dash.harvard.edu/handle/1/40050087
50	P. W.-K. Fong et al., “Printing High-Efficiency Perovskite Solar Cells in High-Humidity Ambient Environment—An In Situ Guided Investigation,” Adv. Sci., vol. 8, no. 6, p. 2003359, 2021, doi: https://doi.org/10.1002/advs.202003359.
51	O. Shargaieva, H. Näsström, J. A. Smith, D. Többens, R. Munir, and E. Unger, “Hybrid perovskite crystallization from binary solvent mixtures: interplay of evaporation rate and binding strength of solvents,” Mater. Adv., vol. 1, no. 9, pp. 3314–3321, 2020, doi: 10.1039/D0MA00815J.
52	ISO, “ISO 14044:2006. Environmental management - Life cycle assessment - Requirements and guidelines,” International Organization for Standardization, 2006. Accessed: Jul. 21, 2021. [Online]. Available: https://www.iso.org/cms/render/live/en/sites/isoorg/contents/data/standard/03/74/37456.html
53	S. Nold, “Techno-ökonomische Bewertung neuer Produktionstechnologien entlang der PhotovoltaikWertschöpfungskette,” Albert-Ludwigs-Universität, Freiburg im Breisgau, 2018.
54	M. Gassner et al., “Energy consumption and material fluxes in hard coating deposition processes,” Surf. Coat. Technol., vol. 299, pp. 49–55, Aug. 2016, doi: 10.1016/j.surfcoat.2016.04.062.
55	J. Fransisco, M. Peinado, M. Salido, and F. Barber, “Optimisation system for cutting continuous layers.” Oct. 2016. [Online]. Available: https://gps.blogs.upv.es/files/2016/09/EN107-web.pdf
56	Intermac, “Float glass cutting tables.” Sep. 2019. [Online]. Available: https://www.intermac.com/downloads/4477/89/P5812P0678_IntGL_Cat_Genius%20RS-A_set19_ENG_Lr.pdf
57	J. Park, D. Hengevoss, and S. Wittkopf, “Industrial Data-Based Life Cycle Assessment of Architecturally Integrated Glass-Glass Photovoltaics,” Buildings, vol. 9, no. 1, Art. no. 1, Jan. 2019, doi: 10.3390/buildings9010008.
58	M. K. van der Hulst et al., “A systematic approach to assess the environmental impact of emerging technologies: A case study for the GHG footprint of CIGS solar photovoltaic laminate,” J. Ind. Ecol., vol. 24, no. 6, pp. 1234–1249, 2020, doi: https://doi.org/10.1111/jiec.13027.
59	R. Frischknecht and N. Jungbluth, “Overview and Methodology. Data v2.0 (2007).,” ETH, Dübendorf, Dec. 2007. [Online]. Available: https://www.ecoinvent.org/files/200712_frischknecht_jungbluth_overview_methodology_ecoinvent2.pdf
60	MRC, “Hot plates.” [Online]. Available: https://www.obrnutafaza.hr/pdf/mrc/proizvodi/Hotplates.pdf
61	“Technical specification for glove box with gas purification system.” [Online]. Available: https://etenders.dpsdae.gov.in/tender_document/tender_49061/tech_com_doc/Annexure_1_Glovebox_specifications.pdf
62	H. Wang, X. Hu, and H. Chen, “The effect of carbon black in carbon counter electrode for CH3NH3PbI3/TiO2 heterojunction solar cells,” RSC Adv., vol. 5, no. 38, pp. 30192–30196, Mar. 2015, doi: 10.1039/C5RA02325D.
63	K. Yasaroglu Ünal, Preparation of a TiO2 Porous Layer by Molding of Polymer Beads for Perovskite Solar Cells Application. Strasbourg, 2019.
64	A. berk Özbilgin, “Cost analysis and life cycle assessment of organic solar cells,” Albert Ludwigs Universität, Freiburg im Breisgau, 2016.
65	R. Frischknecht, P. Stolz, L. Krebs, M. de Wild-SCholten, and P. Sinha, “Life Cycle Inventories and Life Cycle Assessments of Photovoltaic Systems 2020,” IEA PVPS, Dec. 2020. Accessed: Jul. 26, 2021. [Online]. Available: https://iea-pvps.org/wp-content/uploads/2020/12/IEA-PVPS-LCI-report-2020.pdf
66	H. Ritchie and M. Roser, “Energy,” Our World in Data, Nov. 28, 2020. https://ourworldindata.org/energy-mix (accessed Jul. 29, 2021).
67	C. Bailie, “Metal-halide perovskites: the next evolution in photovoltaics,” Stanford, 2016. [Online]. Available: https://site.ieee.org/scv-sust/files/slides/2016-September-Iris-PV-Perovskites-for-IEEE.pdf
68	P. Sihna and L. De Rosa, “Alternatives assessment. Alternaties to SnPb solder for First Solar’s transition from Series 4 to Series 6 manufacturing.” 2019. Accessed: Jul. 26, 201AD. [Online]. Available: https://www.firstsolar.com/en-Emea/-/media/First-Solar/Sustainability-Documents/Alternatives-Assessment-to-SnPb-Solder.ashx
69	K. Bekkelund, “A Comparative Life Cycle Assessment of PV Solar Systems,” 241, 2013, Accessed: Jul. 26, 2021. [Online]. Available: https://ntnuopen.ntnu.no/ntnu-xmlui/handle/11250/235329
70	First Solar, “First solar series 6, module datasheet.” Oct. 2020. [Online]. Available: https://www.firstsolar.com/-/media/First-Solar/Technical-Documents/Series-6-Datasheets/Series-6-Datasheet.ashx?la=en-Emea
71	Pilkington, “Surface Coatings.” http://www.pilkington.com/en-gb/uk/architects/glass-information/energycontrolthermalsolarproperties/coatings (accessed Jul. 20, 2021).
72	M. P. Tsang, G. W. Sonnemann, and D. M. Bassani, “A comparative human health, ecotoxicity, and product environmental assessment on the production of organic and silicon solar cells,” Prog. Photovolt. Res. Appl., vol. 24, no. 5, pp. 645–655, 2016, doi: https://doi.org/10.1002/pip.2704.
73	Double glazing equpiment, “Automatic industrial glass washing machines , PLC flat glass washer.” https://www.doubleglazingequipment.com/sale-8617250-automatic-industrial-glass-washing-machines-plc-flat-glass-washer.html (accessed Jul. 25, 2021).
74	Z. Li et al., “Cost Analysis of Perovskite Tandem Photovoltaics,” Joule, vol. 2, no. 8, pp. 1559–1572, Aug. 2018, doi: 10.1016/j.joule.2018.05.001.
75	Z. Song et al., “A technoeconomic analysis of perovskite solar module manufacturing with low-cost materials and techniques,” Energy Environ. Sci., vol. 10, no. 6, pp. 1297–1305, Jun. 2017, doi: 10.1039/C7EE00757D.
76	N. Espinosa, M. Hösel, D. Angmo, and F. C. Krebs, “Solar cells with one-day energy payback for the factories of the future,” Energy Environ. Sci., vol. 5, no. 1, pp. 5117–5132, Jan. 2012, doi: 10.1039/C1EE02728J.
77	Ecoprogretti, “ECOLAM MAX 10 DS - Laminators | ECOPROGETTI - Specialist in photovoltaic production process,” Ecoprogetti | Specialist in Photovoltaic Production Process. https://ecoprogetti.com/product/ecolam-max-10ds/ (accessed Jul. 26, 2021).
78	M. Redlinger, M. Lokanc, R. Eggert, M. Woodhouse, and A. Goodrich, “The present, mid-term, and long-term supply curves for tellurium; and Updates in the results from NREL’s CdTe PV module manufacturing cost model,” Sep. 30, 2013. [Online]. Available: https://www.nrel.gov/docs/fy13osti/60430.pdf
79	Z. Li et al., “Cost Analysis of Perovskite Tandem Photovoltaics,” Joule, vol. 2, no. 8, pp. 1559–1572, Aug. 2018, doi: 10.1016/j.joule.2018.05.001.
80	A. Ibrahim, “An experimental study on using diethyl ether in a diesel engine operated with diesel-biodiesel fuel blend,” Eng. Sci. Technol. Int. J., vol. 21, no. 5, pp. 1024–1033, Oct. 2018, doi: 10.1016/j.jestch.2018.07.004.
81	S. McAllister, J.-Y. Chen, and A. C. Fernandez-Pello, Fundamentals of Combustion Processes. New York: Springer-Verlag, 2011. doi: 10.1007/978-1-4419-7943-8.
82	A. (ORCID:0000000159823464) Ahmed et al., “Small ester combustion chemistry: Computational kinetics and experimental study of methyl acetate and ethyl acetate,” Proc. Combust. Inst., vol. 37, no. 1, Art. no. NREL/JA-2700-72197, Jul. 2018, doi: 10.1016/j.proci.2018.06.178.
83	Roth & Rau, “Roth & Rau Calipso. Flexible heat treatment furnace.” Accessed: Jul. 24, 2021. [Online]. Available: https://www.lagerwerk.com/media/pdf/55/d1/a5/Produktblatt_CALiPSO.pdf
84	“Technical specification for glove box with gas purification system.” [Online]. Available: https://etenders.dpsdae.gov.in/tender_document/tender_49061/tech_com_doc/Annexure_1_Glovebox_specifications.pdf
85	N. L. Chang, A. W. Y. Ho-Baillie, P. A. Basore, T. L. Young, R. Evans, and R. J. Egan, “A manufacturing cost estimation method with uncertainty analysis and its application to perovskite on glass photovoltaic modules,” Prog. Photovolt. Res. Appl., vol. 25, no. 5, Art. no. 5, 2017, doi: 10.1002/pip.2871.
86	MRC, “Hot plates.” [Online]. Available: https://www.obrnutafaza.hr/pdf/mrc/proizvodi/Hotplates.pdf
87	Gendorf, “Umwelterklärung 2017,” Gendorf, Burgkirchen, May 2017. [Online]. Available: https://www.gendorf.de/-/media/Internet/chemiepark_gendorf_de/Downloads/Nachbarschaft/Umwelterklaerung_2017_final.ashx?la=de-DE
88	DOEBTO, “Energy savings potential and R&D opportunities for Non-Vapor-Compression HVAC technologies,” U.S. Department of Energy Building Technology Office, Burlington, Mar. 2014. [Online]. Available: https://www.energy.gov/sites/prod/files/2014/03/f12/Non-Vapor%20Compression%20HVAC%20Report.pdf
89	J. Xu, J. Zhang, and K. Kuang, Conveyor Belt Furnace Thermal Processing. Cham: Springer International Publishing, 2018. doi: 10.1007/978-3-319-69730-7.
90
91
92
93
94
95
96
97
98
99
100
101
102
103
104
105
106
107
108
109
110
111
112
113
114
115
116
117
118
119
120
121
122
123
124
125
126
127
128
129
130
131
						Based on material used for PSMs [617]. Often still tin-lead solder used in thin film (e.g. CdTe) [618], but Pb-free solder assumed here to omit Pb problems. Amount from [69]
